# Supplementary material for: Metabolic Effects of a Growth Hormone–Releasing Factor in Patients with HIV
Source: Atypon-hosted journal article supplement (doi:10.1056/nejmoa072375), 2007-12-05
Supplement: nejm_falutz_2359sa1.pdf [file nejm_falutz_2359sa1.pdf]

## Supplementary Appendix

This appendix has been provided by the authors to give readers additional information about their work.

Supplement to: Falutz J, Allas S, Blot K, et al. Metabolic effects of a growth hormone–releasing factor in patients with HIV. *N Engl J Med* 2007;357:2359-70.

Supplemental Table 1. Patients Discontinuing with Treatment Emergent Adverse Events

| Placebo     | Adverse Event(s)                                                                    |
|-------------|-------------------------------------------------------------------------------------|
|             | Headaches*                                                                          |
|             | Pain in Hands*                                                                      |
|             | Bilateral Joint Pain*                                                               |
|             | Occasional Elevated Blood Pressure                                                  |
| Tesamorelin |                                                                                     |
|             | Rash*                                                                               |
|             | Fatigue, Headache*                                                                  |
|             | Loss of Mobility of Lower Limbs and Arms*                                           |
|             | Allergic Reaction*                                                                  |
|             | Arthralgias*                                                                        |
|             | Abdominal Rash*                                                                     |
|             | Joint Swelling*                                                                     |
|             | Arthralgia and Pain in Right Knee*                                                  |
|             | Periorbital and Bilateral Hand Swelling*                                            |
|             | Joint Pain                                                                          |
|             | Congestive Heart failure                                                            |
|             | Joint Pain*                                                                         |
|             | Hyperglycemia                                                                       |
|             | Myalgia                                                                             |
|             | Rectal Cancer                                                                       |
|             | Swelling of Extremities, Joint Pain in Feet, Hands, Paresthesias of Hands and Feet* |
|             | Abdominal Abscess, Possible Sepsis, Dehydration*                                    |
|             | Numbness in Hands*                                                                  |
|             | Constipation                                                                        |
|             | Injection Site Itchiness, Facial and Upper Body Redness*                            |
|             | Diarrhea*                                                                           |
|             | Intermittent Muscle Pain*                                                           |
|             | Carpal Tunnel Syndrome*                                                             |
|             | Left Breast Enlargement*                                                            |
|             | Numbness in Hands*                                                                  |
|             | Benign Prostatic Hypertrophy                                                        |
|             | Hives*                                                                              |
|             | Hives*                                                                              |
|             | Redness and Itching at Injection Site*                                              |
|             | Pain in Fingers, Hands and Hips, Hypertension*                                      |
|             | Injection Site reaction                                                             |
|             | Neuropathy, Anxiety*                                                                |
|             | Carpal Tunnel Syndrome*                                                             |

\* Patients classified as non-completers and discontinued due to an adverse event

Supplemental Table 2.

Effects of Antibodies to Tesamorelin on Changes in Visceral Adipose Tissue

| Parameter                                  | Statistic                                                   | Antibodies |          |
|--------------------------------------------|-------------------------------------------------------------|------------|----------|
|                                            |                                                             | Positive   | Negative |
| Number of Patients                         | N                                                           | 121        | 142      |
| Visceral adipose tissue (cm <sup>2</sup> ) |                                                             |            |          |
| Baseline                                   | n                                                           | 120        | 142      |
|                                            | Mean                                                        | 176        | 180      |
|                                            | SD                                                          | 69.9       | 82.9     |
| Week 26<br>Actual                          | n                                                           | 121        | 142      |
|                                            | Mean                                                        | 144        | 154      |
|                                            | SD                                                          | 70.0       | 77.0     |
| Week 26<br>Percent Change (%)              | n                                                           | 120        | 142      |
|                                            | Mean                                                        | -18.2      | -13.7    |
|                                            | SD                                                          | 21.4       | 20.5     |
|                                            | p-value for antibodies <sup>1</sup>                         | 0.07       |          |
|                                            | p-value for baseline-by-antibodies interaction <sup>2</sup> | 0.61       |          |

Note: VAT – Visceral Adipose Tissue

<sup>1</sup> p-value from ANCOVA on the natural log ratio of VAT to baseline VAT. The model includes the natural log of baseline VAT and the antibodies effect.

<sup>2</sup> p-value from ANCOVA on the natural log ratio of VAT to baseline VAT. The model includes the natural log of baseline VAT, the antibodies effect and the natural log of baseline VAT by antibodies interaction.

Effects of Antibodies to Tesamorelin on Changes in IGF-I

| Parameter                       | Statistic                                                   | Antibodies |          |
|---------------------------------|-------------------------------------------------------------|------------|----------|
|                                 |                                                             | Positive   | Negative |
| Number of Patients              | N                                                           | 121        | 142      |
| IGF-I Serum (ng/mL)             |                                                             |            |          |
| Baseline                        | n                                                           | 119        | 140      |
|                                 | Mean                                                        | 163        | 162      |
|                                 | SD                                                          | 58.6       | 60.7     |
| Week 26<br>Actual               | n                                                           | 121        | 142      |
|                                 | Mean                                                        | 273        | 278      |
|                                 | SD                                                          | 123        | 122      |
| Week 26<br>Change from Baseline | n                                                           | 119        | 140      |
|                                 | Mean                                                        | 109        | 116      |
|                                 | SD                                                          | 115        | 112      |
|                                 | p-value for antibodies <sup>1</sup>                         | 0.67       |          |
|                                 | p-value for baseline-by-antibodies interaction <sup>2</sup> | 0.88       |          |

<sup>1</sup> p-value from ANCOVA on the IGF-I change from baseline. The model includes the baseline IGF-I and the antibodies effect.

<sup>2</sup> p-value from ANCOVA on the IGF-I change from baseline. The model includes the baseline IGF-I, the antibodies effect and the baseline IGF-I by antibodies interaction.
